# Supplementary material for: Rational design of 0D/3D Sn3O4/NiS nanocomposites for enhanced photocatalytic hydrogen generation
Source: Royal Society of Chemistry journal article supplement (doi:10.1039/d2nj02309a), 2022-01-01
Supplement: d2nj02309a1.pdf [file d2nj02309a1.pdf]

## ***Supporting Information***

### **Ration design of 0D/3D Sn<sub>3</sub>O<sub>4</sub>/NiS nanocomposite for enhanced photocatalytic hydrogen generation**

Hele Liu <sup>a</sup>, Pengfei Tan <sup>a\*</sup>, Huanhuan Zhai <sup>a</sup>, Mingyuan Zhang <sup>a</sup>, Jiaoyang Chen <sup>a</sup>,  
Ruifeng Ren <sup>a</sup>, Ziyu Wang <sup>b</sup>, Jun Pan <sup>a\*</sup>

<sup>a</sup> State Key Laboratory for Powder Metallurgy, Central South University, Changsha  
410083, PR China

<sup>b</sup> The Institute of Technological Sciences, Wuhan University, Wuhan 430072, PR  
China

\* Corresponding authors

E-mail address: jun.pan@csu.edu.cn; tpf0203@csu.edu.cn

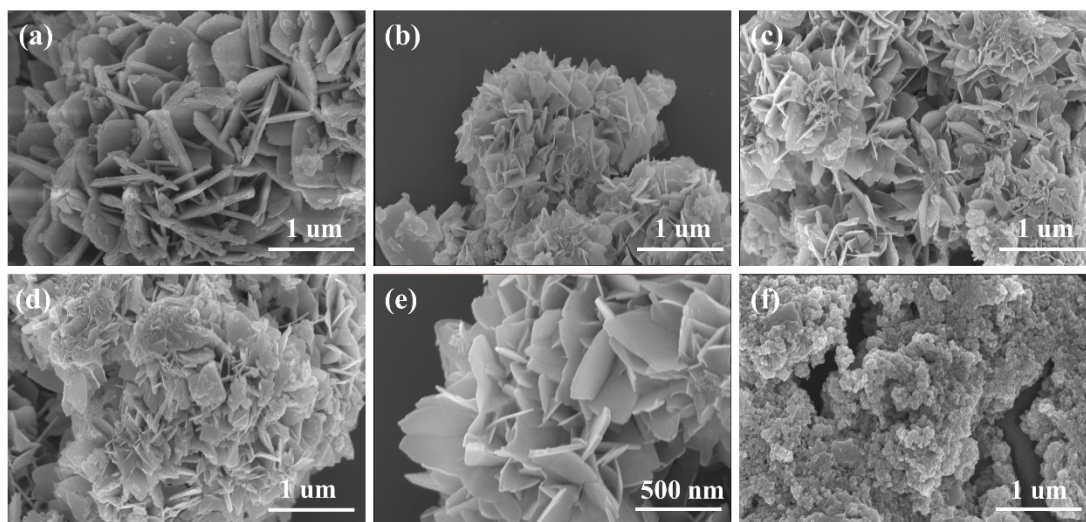

**Fig. S1** SEM images of (a-d)  $\text{Sn}_3\text{O}_4/0.3\%$  NiS,  $\text{Sn}_3\text{O}_4/0.5\%$  NiS,  $\text{Sn}_3\text{O}_4/1.5\%$  NiS,  $\text{Sn}_3\text{O}_4/2.0\%$  NiS, (e)  $\text{Sn}_3\text{O}_4$ , (f) NiS nanoparticles.

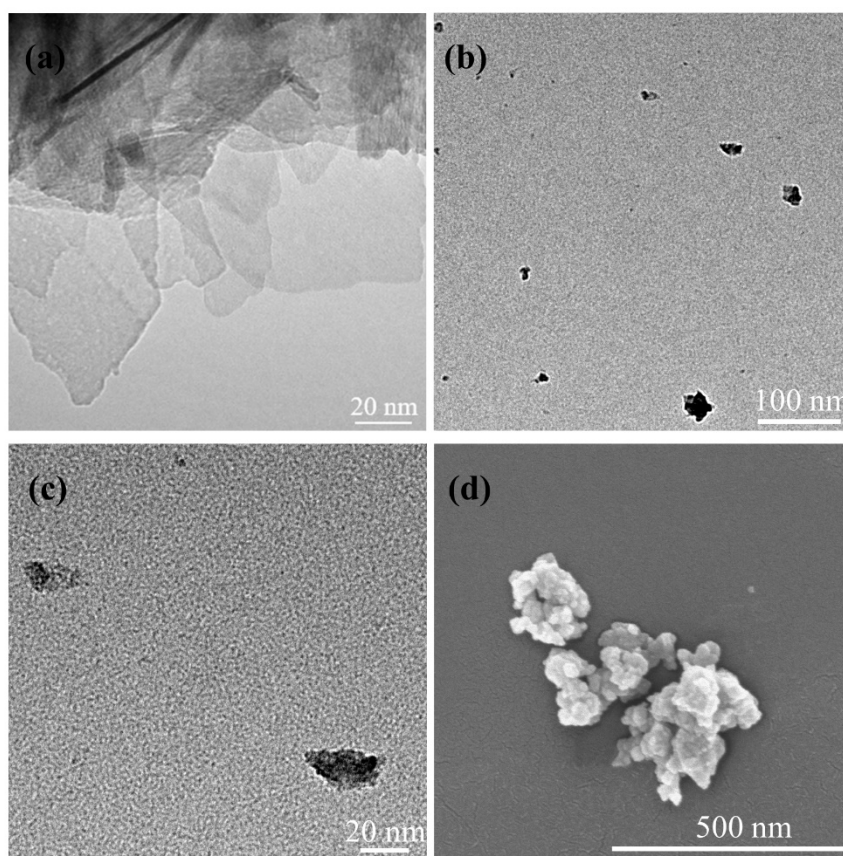

**Fig. S2** (a) HRTEM image of the  $\text{Sn}_3\text{O}_4$ , (b) TEM image of the NiS, (c) HRTEM image of the NiS, (d) SEM image of NiS.

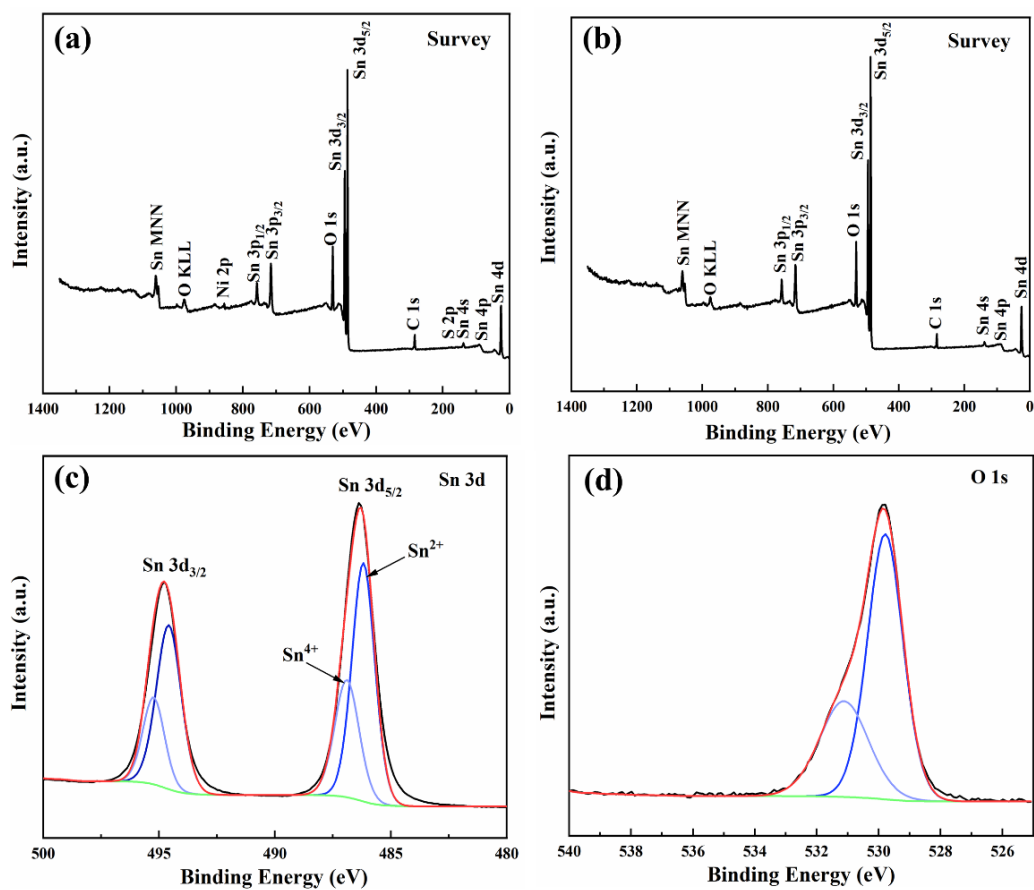

**Fig. S3** XPS spectra of  $\text{Sn}_3\text{O}_4/1.0\% \text{NiS}$ : (a) survey spectrum, XPS spectra of  $\text{Sn}_3\text{O}_4$ : (b) survey spectrum and the high-resolution XPS spectra of (c) Sn 3d, (d) O 1s.

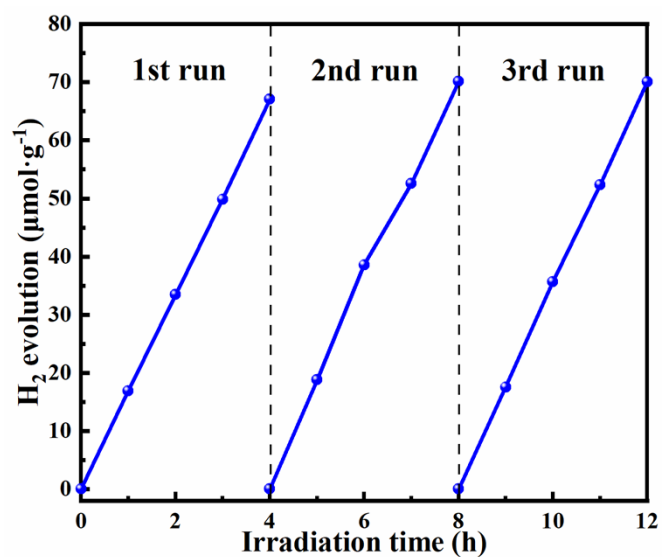

**Fig. S4** The cyclic hydrogen production test of  $\text{Sn}_3\text{O}_4/1.0\% \text{NiS}$  under visible light.

## Apparent quantum efficiency (AQE) calculation

Using 300 W Xenon lamp as light source and 420 nm bandpass filter, the hydrogen production after 4 h of light is measured, so as to obtain the apparent quantum rate of photocatalyst. The AQE calculation formula is as follows.<sup>1,2</sup>

$$\text{AQE (\%)} = \frac{2 \times \text{number of evolved hydrogen molecules}}{\text{Number of incident photons}} \times 100\%$$

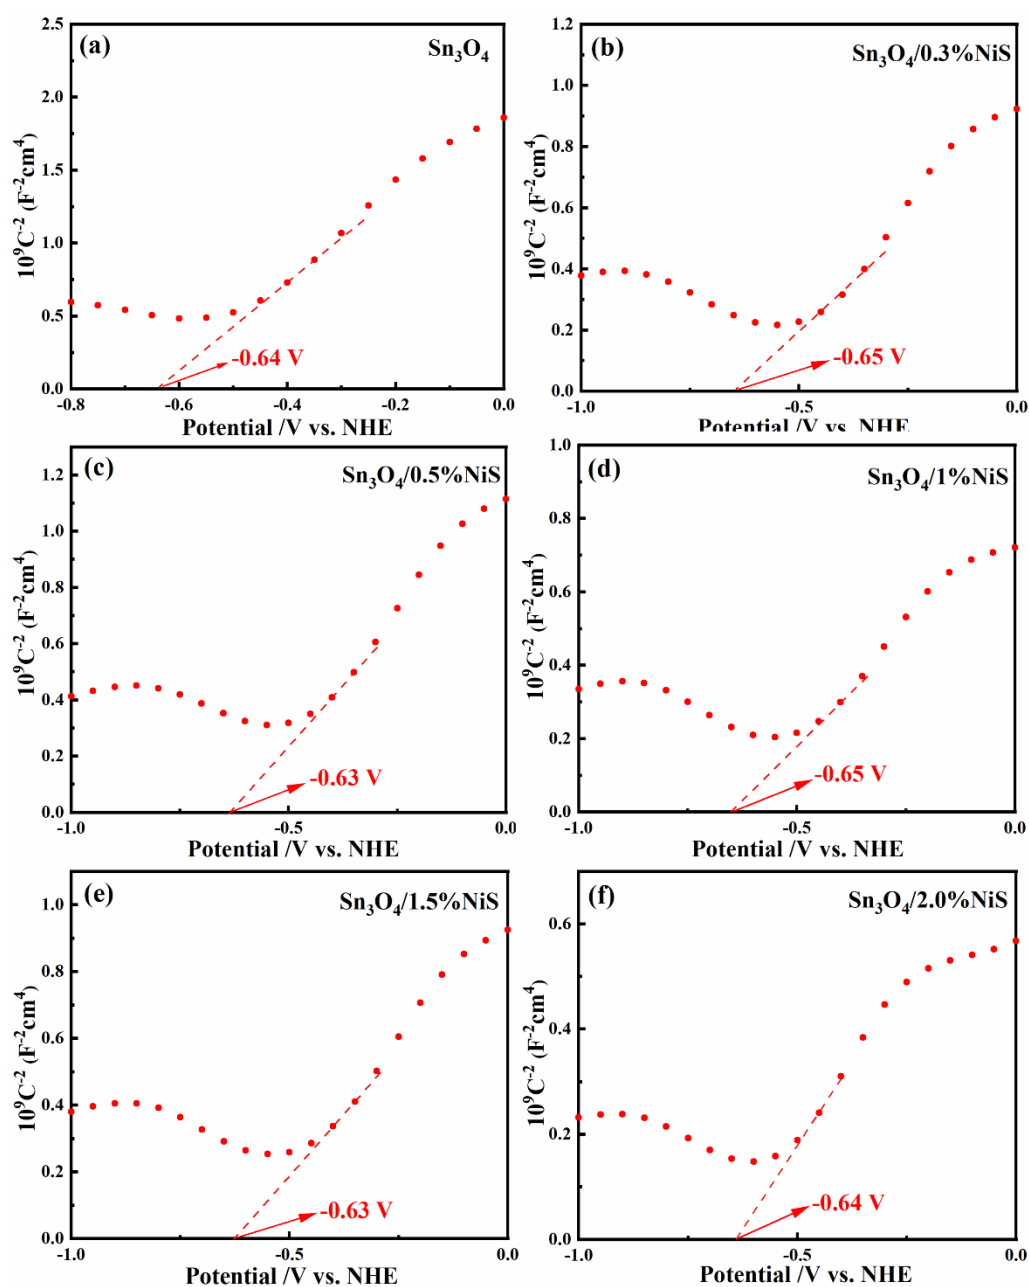

**Fig. S5** The Mott-Schottky curve of (a) pure  $\text{Sn}_3\text{O}_4$ , (b)  $\text{Sn}_3\text{O}_4/0.3\% \text{NiS}$ , (c)  $\text{Sn}_3\text{O}_4/0.5\% \text{NiS}$ , (d)  $\text{Sn}_3\text{O}_4/1.0\% \text{NiS}$ , (e)  $\text{Sn}_3\text{O}_4/1.5\% \text{NiS}$ , (f)  $\text{Sn}_3\text{O}_4/2.0\% \text{NiS}$ .

Table S1 Summary of hydrogen evolution rates of Sn<sub>3</sub>O<sub>4</sub>-based materials in recent studies

| Sr. No. | Photocatalyst material                                     | Light source                  | Scavenger                              | H <sub>2</sub> evolution (μmol · g <sup>-1</sup> · h <sup>-1</sup> ) | Ref.                               |
|---------|------------------------------------------------------------|-------------------------------|----------------------------------------|----------------------------------------------------------------------|------------------------------------|
| 01      | Sn <sub>3</sub> O <sub>4</sub> /NiS                        | Visible light<br>(λ ≥ 420 nm) | CH <sub>3</sub> OH aqueous<br>solution | 17.43                                                                | This work                          |
| 02      | Sn <sub>3</sub> O <sub>4</sub> /Pt                         | Visible light<br>(λ > 400 nm) | CH <sub>3</sub> OH aqueous<br>solution | 16.66                                                                | Manikandan<br>et al.; <sup>3</sup> |
| 03      | Sn <sub>3</sub> O <sub>4</sub> /TiO <sub>2</sub>           | Simulated<br>sunlight         | CH <sub>3</sub> OH aqueous<br>solution | 17.00                                                                | Yu et al.; <sup>4</sup>            |
| 04      | Sn <sub>3</sub> O <sub>4</sub> /rGO                        | Visible light<br>(λ ≥ 420 nm) | CH <sub>3</sub> OH aqueous<br>solution | 19.95                                                                | Yu et al.; <sup>5</sup>            |
| 05      | Sn <sub>3</sub> O <sub>4</sub> microballs                  | Simulated<br>sunlight         | CH <sub>3</sub> OH aqueous<br>solution | 8.84                                                                 | Balgude et<br>al.; <sup>6</sup>    |
| 06      | Sn <sub>3</sub> O <sub>4</sub> @BiVO <sub>4</sub> -QD      | Simulated<br>sunlight         | CH <sub>3</sub> OH aqueous<br>solution | 12.10                                                                | Chen et al.; <sup>7</sup>          |
| 07      | Ni doped Sn <sub>3</sub> O <sub>4</sub>                    | Visible light<br>(λ ≥ 420 nm) | CH <sub>3</sub> OH aqueous<br>solution | 14.55                                                                | Yang et al.; <sup>8</sup>          |
| 08      | Sn <sub>3</sub> O <sub>4</sub>                             | Visible light<br>(λ > 400 nm) | CH <sub>3</sub> OH aqueous<br>solution | 9.00                                                                 | Tanabe et<br>al.; <sup>9</sup>     |
| 09      | Phosphoric acid<br>modified Sn <sub>3</sub> O <sub>4</sub> | Simulated<br>sunlight         | Overall water<br>splitting             | 9.60                                                                 | Chen et al.; <sup>10</sup>         |
| 10      | Ultrathin nanosheet<br>Sn <sub>3</sub> O <sub>4</sub>      | Visible light<br>(λ > 400 nm) | CH <sub>3</sub> OH aqueous<br>solution | 15.50                                                                | Tanabe et<br>al.; <sup>11</sup>    |

Table S2 Attenuation time and relative amplitude parameters of the Sn<sub>3</sub>O<sub>4</sub> and Sn<sub>3</sub>O<sub>4</sub>/1%NiS, as well as the mean lifetime after fitting accordingly.

| Samples                               | $\tau_1$ (ns) | $\tau_2$ (ns) | A <sub>1</sub> (%) | A <sub>2</sub> (%) | $\tau_a$ (ns) |
|---------------------------------------|---------------|---------------|--------------------|--------------------|---------------|
| Sn <sub>3</sub> O <sub>4</sub>        | 0.166         | 3.41          | 780.81             | 84.67              | 2.41          |
| Sn <sub>3</sub> O <sub>4</sub> /1%NiS | 1.39          | 8.142         | 39.12              | 13.26              | 5.70          |

The mean lifetime of fluorescence emission was measured by a formula  $\langle \tau \rangle = \sum_i \frac{A_i t_i^2}{A_i t_i}$ .

## References

- 1 B. Lin, H. Li, H. An, W. Hao, J. Wei, Y. Dai, C. Ma and G. Yang, *Appl. Catal., B*, 2018, **220**, 542-552.
- 2 H. Li, X. Yan, B. Lin, M. Xia, J. Wei, B. Yang and G. Yang, *Nano Energy*, 2018, **47**, 481-493.
- 3 M. Manikandan, T. Tanabe, P. Li, S. Ueda, G. V. Ramesh, R. Kodiyath, J. Wang, T. Hara, A. Dakshanamoorthy, S. Ishihara, K. Ariga, J. Ye, N. Umezawa and H. Abe, *ACS Appl. Mater. Interfaces*, 2014, **6**, 3790-3793.
- 4 X. Yu, L. Wang, J. Zhang, W. Guo, Z. Zhao, Y. Qin, X. Mou, A. Li and H. Liu, *J. Mater. Chem. A*, 2015, **3**, 19129-19136.
- 5 X. Yu, Z. Zhao, D. Sun, N. Ren, J. Yu, R. Yang and H. Liu, *Appl. Catal., B*, 2018, **227**, 470-476.
- 6 S. Balgude, Y. Sethi, B. Kale, D. Amalnerkar and P. Adhyapak, *Mater. Chem. Phys.*, 2019, **221**, 493-500.
- 7 L. Chen, C. Hou, Z. Liu, Y. Qu, M. Xie and W. Han, *Chem. Commun.*, 2020, **56**, 13884-13887.
- 8 R. Yang, Y. Ji, L. Wang, G. Song, A. Wang, L. Ding, N. Ren, Y. Lv, J. Zhang and X. Yu, *ACS Appl. Nano Mater.*, 2020, **3**, 9268-9275.
- 9 T. Tanabe, T. Tanikawa, K. Nakamori, S. Ueda, B. Nanzai, Y. Matsubara and F. Matsumoto, *Int. J. Hydrogen Energy*, 2020, **45**, 28607-28615.
- 10 L. Chen, S. Yue, J. Wang, W. Chen, Y. Zhang, M. Xie and W. Han, *Appl. Catal., B*, 2021, **299**, 120689.
- 11 T. Tanabe, K. Nakamori, T. Tanikawa, Y. Matsubara and F. Matsumoto, *J. Photochem. Photobiol., A*, 2021, **420**, 113486.
